# Supplementary material
Source: Springer Nature journal article supplement (https://www.springermedizin.de/resource/supplementary/13014_2009_188_MOESM3_ESM.pdf/9633094)

**A.**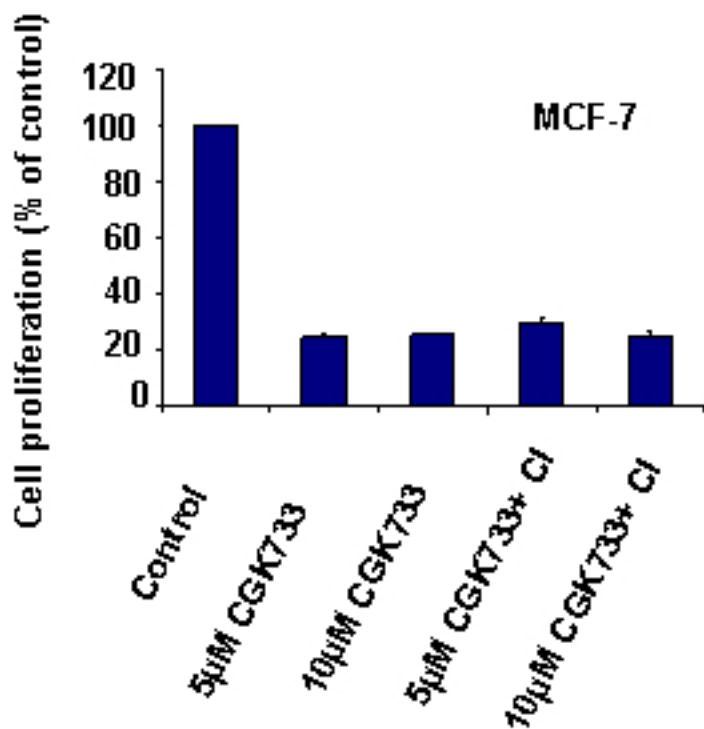**B.**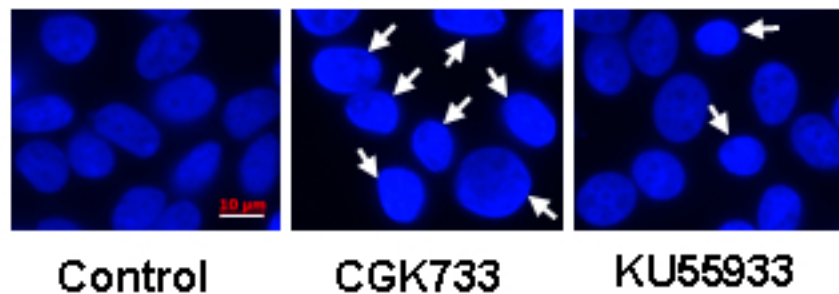

Supplement: MOESM3 [file 9633094]
